# Supplementary material
Source: Springer Nature journal article supplement (https://www.springermedizin.de/resource/supplementary/12905_2007_131_MOESM5_ESM.pdf/9519148)
Supplement: MOESM5 [file 9519148]

**PREGNANT WOMEN  
(MATERNITY CLINICS)**

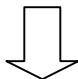

**POSTPARTUM WOMEN  
(CHILD HEALTH CLINICS)**

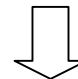

**Background information and baseline leisure time physical activity (LTPA)**

8-9 weeks'  
gestation

Usual care + PAC

Usual care + PAC

2 months from  
delivery

**I follow-up 16-18 weeks' gestation: LTPA**

16-18 weeks'  
gestation

Usual care + PAC booster 1

Usual care + PAC booster 1

3 months from  
delivery

22-24 weeks'  
gestation

Usual care + PAC booster 2

Usual care + PAC booster 2

5 months from  
delivery

32-34 weeks'  
gestation

Usual care + PAC booster 3

Usual care + PAC booster 3

6 months from  
delivery

**II follow-up 37 weeks' gestation : LTPA + participant  
responsiveness**

37 weeks'  
gestation

Usual care + PAC booster 4

**I follow-up 5 months from delivery : LTPA**

Usual care + PAC booster 4

10 months from  
delivery

**II follow-up 10 months from delivery : LTPA + participant  
responsiveness**
